# Supplementary material for: Excessive daytime sleepiness in a model of Parkinson’s disease improved by low-frequency stimulation of the pedunculopontine nucleus
Source: PubMed Central journal article supplement (PMC9876933; doi:10.1038/s41531-023-00455-7), 2023-01-25
Supplement: 41531_2023_455_MOESM1_ESM.pdf [file 41531_2023_455_MOESM1_ESM.pdf]

1 **Supplementary information**

2

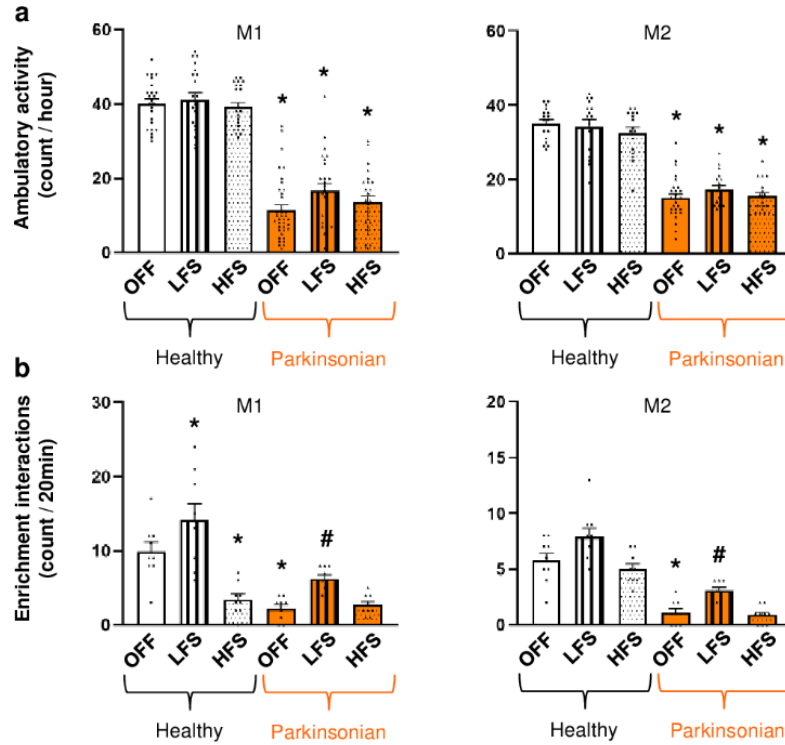

3

4 **Supplementary Figure 1: Effect of PPN-LFS and -HFS on motor behavior in parkinsonian animals.** **a** Ambulatory  
5 locomotor activity, expressed in count per hour (mean  $\pm$  SEM), calculated at fixed time (10:00 h) in healthy (white) and  
6 parkinsonian (orange) states, with PPN-LFS (vertical lines) or PPN-HFS (dots), repeated minimum 18 times for M1 (left) and  
7 M2 (right). **b** Number of interactions with the enrichment (mean  $\pm$  SEM) present in the behavioral cage during 9 random light-  
8 OFF sessions for M1 (left) and M2 (right). \*different from healthy state OFF-stimulation, # different from parkinsonian state  
9 OFF-stimulation: Kruskal-Wallis test followed by Dunn's multiple comparisons test was used to determine whether motor  
10 changes were dependent on the different PPN-DBS conditions.

11

12

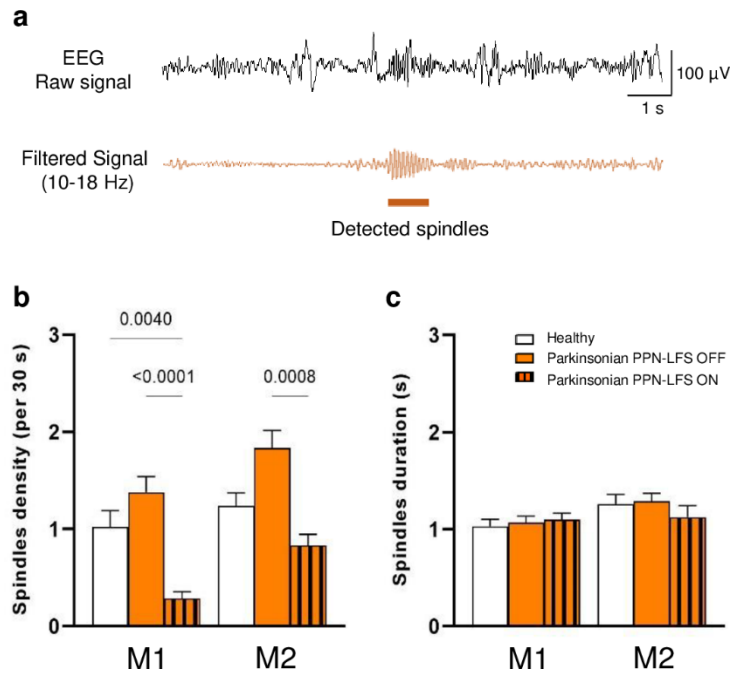

13

14 **Supplementary Figure 2: Basic features of sleep spindles during non-REM sleep stage 2.** **a** Example of a recorded  
15 spindle events. **b** Spindles density per 30 s (mean  $\pm$  SEM) during non-REM sleep N2 for M1 and M2 in healthy (white),  
16 parkinsonian (orange) and parkinsonian with PPN-LFS (orange with vertical lines) conditions. **c** Spindles duration, expressed  
17 in second (mean  $\pm$  SEM). A Kruskal-Wallis test followed by Dunn's multiple comparisons test was used to compare in the  
18 healthy, parkinsonian and parkinsonian with PPN-LFS conditions.
